# Supplementary material for: Evaluation of the correctable decoding sequencing as a new powerful strategy for DNA sequencing
Source: PubMed Central journal article supplement (PMC9012935; doi:10.26508/lsa.202101294), 2022-04-14
Supplement: LSA-2021-01294_review_history.pdf [file LSA-2021-01294_review_history.pdf]

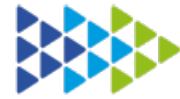

Life Science Alliance

# Evaluation of the correctable decoding sequencing as a new powerful strategy for DNA sequencing

Chu Cheng and Pengfeng Xiao

DOI: <https://doi.org/10.26508/lsa.202101294>

Corresponding author(s): Pengfeng Xiao, Southeast University

---

## Review Timeline:

|                     |            |
|---------------------|------------|
| Submission Date:    | 2021-11-10 |
| Editorial Decision: | 2022-01-17 |
| Revision Received:  | 2022-03-02 |
| Editorial Decision: | 2022-03-31 |
| Revision Received:  | 2022-04-01 |
| Accepted:           | 2022-04-01 |

---

Scientific Editor: Novella Guidi

## Transaction Report:

(Note: With the exception of the correction of typographical or spelling errors that could be a source of ambiguity, letters and reports are not edited. The original formatting of letters and referee reports may not be reflected in this compilation.)

January 17, 2022

Re: Life Science Alliance manuscript #LSA-2021-01294

Prof. Pengfeng Xiao  
Southeast University  
Si Pai Lou 2#, Xuanwu District  
Nanjing 210096  
China

Dear Dr. Xiao,

Thank you for submitting your manuscript entitled "Evaluation of the correctable decoding sequencing as a new powerful strategy for DNA sequencing" to Life Science Alliance. The manuscript was assessed by expert reviewers, whose comments are appended to this letter. We, thus, encourage you to submit a revised version of the manuscript back to LSA that responds to all of the reviewers' points.

To upload the revised version of your manuscript, please log in to your account: <https://lsa.msubmit.net/cgi-bin/main.plex>

You will be guided to complete the submission of your revised manuscript and to fill in all necessary information. Please get in touch in case you do not know or remember your login name.

While you are revising your manuscript, please also attend to the below editorial points to help expedite the publication of your manuscript. Please direct any editorial questions to the journal office.

The typical timeframe for revisions is three months. Please note that papers are generally considered through only one revision cycle, so strong support from the referees on the revised version is needed for acceptance.

When submitting the revision, please include a letter addressing the reviewers' comments point by point.

We hope that the comments below will prove constructive as your work progresses.

Thank you for this interesting contribution to Life Science Alliance. We are looking forward to receiving your revised manuscript.

Sincerely,

Novella Guidi, PhD  
Scientific Editor  
Life Science Alliance

-----  
**A. THESE ITEMS ARE REQUIRED FOR REVISIONS**

-- A letter addressing the reviewers' comments point by point.

-- An editable version of the final text (.DOC or .DOCX) is needed for copyediting (no PDFs).

-- High-resolution figure, supplementary figure and video files uploaded as individual files: See our detailed guidelines for preparing your production-ready images, <https://www.life-science-alliance.org/authors>

-- Summary blurb (enter in submission system): A short text summarizing in a single sentence the study (max. 200 characters including spaces). This text is used in conjunction with the titles of papers, hence should be informative and complementary to the title and running title. It should describe the context and significance of the findings for a general readership; it should be written in the present tense and refer to the work in the third person. Author names should not be mentioned.

-- By submitting a revision, you attest that you are aware of our payment policies found here: <https://www.life-science-alliance.org/copyright-license-fee>

**B. MANUSCRIPT ORGANIZATION AND FORMATTING:**

Full guidelines are available on our Instructions for Authors page, <https://www.life-science-alliance.org/authors>

We encourage our authors to provide original source data, particularly uncropped/-processed electrophoretic blots and spreadsheets for the main figures of the manuscript. If you would like to add source data, we would welcome one PDF/Excel-file per figure for this information. These files will be linked online as supplementary "Source Data" files.

\*\*\*IMPORTANT: It is Life Science Alliance policy that if requested, original data images must be made available. Failure to provide original images upon request will result in unavoidable delays in publication. Please ensure that you have access to all original microscopy and blot data images before submitting your revision.\*\*\*

-----  
Reviewer #1 (Comments to the Authors (Required)):

The Manuscript „Evaluation of the correctable decoding sequencing as a new powerful strategy for DNA sequencing" describes a theoretical approach to enhance accuracy of existing next generation sequencing platforms. The innovation it presents consist of replacing the single-base flows in conventional single nucleotide addition sequencing workflows with dual-base additions. This is not entirely new and will result in highly ambiguous sequencing results, that can only be interpreted by repetition of the sequencing workflow with different dual-base combinations. The approach presented here replaces the dual-base addition of two natural nucleotides with a mixture of a natural and a reversibly terminated nucleotide. Combined with regular deblocking flows to remove the terminators This will result in less ambiguous sequencing results that can be decoded by only two consecutive sequencing runs with the same template.

The approach seems original and the claim for higher accuracy is justified. Some simulated results are included. I would support acceptance of the manuscript, after some minor revisions: (1) A software is mentioned that can simulate sequencing results as they would be expected from the described sequencing method. As the ability to correct sequencing errors is claimed, a reasonably large set of sequencing reads containing errors according to the typical error profile of one of the mentioned commercial systems should be generated and subjected to the proposed error correction. The outcome of this simulation should be shown to justify the claim of extraordinary sequence accuracies, eg by presenting a statistics about the raw error rate of the simulated reads and a final error rate after algorithmic error correction. (2) The overall language quality of the manuscript is quite poor with a lot of grammar errors, incomplete sentences, missing words and incorrect expressions. Therefore language editing by a native or highly proficient english speaking person seems necessary.

Reviewer #2 (Comments to the Authors (Required)):

The manuscript "Evaluation of the correctable decoding sequencing technology as a new powerful strategy for DNA sequencing" proposed the new protocol to reduce the error in existing NGS platforms. As there are so many applications of NGS, one of them is pharmacogenomics studies which are mainly based on SNPs. less error in sequencing is directly proportional to less false-positive SNPs and other variations, there is a need for such protocol which fulfill this requirement.

#### Major Issue

The overall manuscript is in good shape and provides a useful alternative, but, as the author proposed new software to analyze and assemble sequences how they claim that they reduce the shortcoming of NGS platforms. Here as per the manuscript, it seems that they relied on the same platform but proposed the new algorithm/ software to analyze sequence more accurately. They should clearly claim for a new protocol, not a platform.

There are a few minor queries as well

- Author claims single-read information accuracy, what is the basis of this claim?
- What will be standard sequence coverage for the proposed method?

**I want to thank all reviewers for giving us constructive suggestions which would help us to improve the quality of the paper. We have made great effort to revise the manuscript in accordance with the reviewers' comments, and carefully proof-read the manuscript to minimize typographical, grammatical, and bibliographical errors. Here below is our point-to-point response to the two reviewers' comments.**

Reviewer #1:

Comment 1: A software is mentioned that can simulate sequencing results as they would be expected from the described sequencing method. As the ability to correct sequencing errors is claimed, a reasonably large set of sequencing reads containing errors according to the typical error profile of one of the mentioned commercial systems should be generated and subjected to the proposed error correction. The outcome of this simulation should be shown to justify the claim of extraordinary sequence accuracies, eg by presenting a statistics about the raw error rate of the simulated reads and a final error rate after algorithmic error correction.

**Response: Thanks for your valuable comments on the paper. The statistics for the simulation of sequencing under different raw error rate have been added in Result Section "Error correction strategy of the correctable decoding sequencing approach".**

Comment 2: The overall language quality of the manuscript is quite poor with a lot of grammar errors, incomplete sentences, missing words and incorrect expressions.

Therefore language editing by a native or highly proficient English speaking person seems necessary.

**Response: We are very sorry for our language problem. We have checked the full text and the spelling and grammar errors have been checked and corrected. The level of English throughout the manuscript have been language polished by MJEditor (www.mjeditor.com)**

Reviewer #2:

Comment 1: The overall manuscript is in good shape and provides a useful alternative, but, as the author proposed new software to analyze and assemble sequences how they claim that they reduce the shortcoming of NGS platforms. Here as per the manuscript, it seems that they relied on the same platform but proposed the new algorithm/software to analyze sequence more accurately. They should clearly claim for a new protocol, not a platform.

**Response: Thank you for the comments on the paper. Your advice is very good. The approach we proposed is a new protocol, not a platform. We have changed in this manuscript.**

Comment 2: Author claims single-read information accuracy, what is the basis of this claim?

**Response: A template needs to be interrogated twice in the correctable decoding sequencing approach. Therefore, a completely aligned sequence of consecutive bases can be obtained only for two different sequential sequences with the same base deletion or insertion at the same base position (including homopolymer region), as well as with the same pattern and number of sequencing errors. In the simulation, we calculated a conservative theoretical error rate of 0.0009% (lower than that for Sanger sequencing). Thus, this proposed approach can be used to assess the correctness of a single sequencing read.**

Comment 3: What will be standard sequence coverage for the proposed method?

**Response: Unlike the current NGS, the template is interrogated via multiple parallel sequencing runs (not simple repetitions) with the correctable decoding sequencing method, we can determine whether the original sequencing information is correct by aligning any two sets of sequencing information, and the corrected "alignment information" can be used as a read for sequence assembly. Therefore, theoretically, accurate sequence information can be obtained when the sequencing depth is 1×, thereby reducing the coverage required for assembly. In general, the sequencing depth refers to the coverage depth of the sequencing data on the genome. Coverage is the proportion of the genome that can be covered by sequencing data compared to the reference genome. For example, if the human genome is 3G, we measured and filtered 90G of clean data, then the sequencing depth is  $90/3=30x$ , and the coverage is 80%. Therefore, the specific coverage is related to the composition of the genome to be sequenced and fragmentation technology.**

We appreciate for Editors/Reviewers' warm work earnestly, and hope that the correction will meet with approval. Should you have any questions, please contact us without hesitate.

Once again, thank you very much for your comments and suggestion.

Sincerely yours,

Corresponding author:

Name: Pengfeng Xiao

E-mail: xiaopf@seu.edu.cn

March 31, 2022

RE: Life Science Alliance Manuscript #LSA-2021-01294R

Prof. Pengfeng Xiao  
Southeast University  
Si Pai Lou 2#, Xuanwu District  
Nanjing 210096  
China

Dear Dr. Xiao,

Thank you for submitting your revised manuscript entitled "Evaluation of the correctable decoding sequencing as a new powerful strategy for DNA sequencing". We would be happy to publish your paper in Life Science Alliance pending final revisions necessary to meet our formatting guidelines.

Along with points mentioned below, please tend to the following:

- please add ORCID ID for the corresponding author-you should have received instructions on how to do so
- please add the Twitter handle of your host institute/organization as well as your own or/and one of the authors in our system
- titles in the system and manuscript file must match
- please consult our manuscript preparation guidelines <https://www.life-science-alliance.org/manuscript-prep> and make sure your manuscript sections are in the correct order;
- please add an Author Contributions section to your main manuscript text
- tables should be included at the bottom of the main manuscript file or be sent as separate files
- please add your main, supplementary figure, and table legends to the main manuscript text after the references section
- please label the last figure as figure 6 (currently there are two figures labeled as figure 5)
- please provide a Data Availability section

If you are planning a press release on your work, please inform us immediately to allow informing our production team and scheduling a release date.

LSA now encourages authors to provide a 30-60 second video where the study is briefly explained. We will use these videos on social media to promote the published paper and the presenting author (for examples, see <https://twitter.com/LSAjournal/timelines/1437405065917124608>). Corresponding or first-authors are welcome to submit the video. Please submit only one video per manuscript. The video can be emailed to [contact@life-science-alliance.org](mailto:contact@life-science-alliance.org)

To upload the final version of your manuscript, please log in to your account: <https://lsa.msubmit.net/cgi-bin/main.plex>  
You will be guided to complete the submission of your revised manuscript and to fill in all necessary information. Please get in touch in case you do not know or remember your login name.

To avoid unnecessary delays in the acceptance and publication of your paper, please read the following information carefully.

#### A. FINAL FILES:

These items are required for acceptance.

-- An editable version of the final text (.DOC or .DOCX) is needed for copyediting (no PDFs).

-- High-resolution figure, supplementary figure and video files uploaded as individual files: See our detailed guidelines for preparing your production-ready images, <https://www.life-science-alliance.org/authors>

-- Summary blurb (enter in submission system): A short text summarizing in a single sentence the study (max. 200 characters including spaces). This text is used in conjunction with the titles of papers, hence should be informative and complementary to the title. It should describe the context and significance of the findings for a general readership; it should be written in the present tense and refer to the work in the third person. Author names should not be mentioned.

#### B. MANUSCRIPT ORGANIZATION AND FORMATTING:

Full guidelines are available on our Instructions for Authors page, <https://www.life-science-alliance.org/authors>

We encourage our authors to provide original source data, particularly uncropped/-processed electrophoretic blots and spreadsheets for the main figures of the manuscript. If you would like to add source data, we would welcome one PDF/Excel-file per figure for this information. These files will be linked online as supplementary "Source Data" files.

**\*\*Submission of a paper that does not conform to Life Science Alliance guidelines will delay the acceptance of your manuscript.\*\***

**\*\*It is Life Science Alliance policy that if requested, original data images must be made available to the editors. Failure to provide original images upon request will result in unavoidable delays in publication. Please ensure that you have access to all original data images prior to final submission.\*\***

**\*\*The license to publish form must be signed before your manuscript can be sent to production. A link to the electronic license to publish form will be sent to the corresponding author only. Please take a moment to check your funder requirements.\*\***

**\*\*Reviews, decision letters, and point-by-point responses associated with peer-review at Life Science Alliance will be published online, alongside the manuscript. If you do want to opt out of having the reviewer reports and your point-by-point responses displayed, please let us know immediately.\*\***

Thank you for your attention to these final processing requirements. Please revise and format the manuscript and upload materials within 7 days.

Thank you for this interesting contribution, we look forward to publishing your paper in Life Science Alliance.

Sincerely,

Novella Guidi, PhD  
Scientific Editor  
Life Science Alliance

-----  
Reviewer #1 (Comments to the Authors (Required)):

The revised version of the manuscript „Evaluation of the correctable decoding sequencing as a new powerful strategy for DNA sequencing" describes a theoretical approach to enhance accuracy of existing next generation sequencing platforms. The innovation it presents consist of replacing the single-base flows in conventional single nucleotide addition sequencing workflows with dual-base additions. This is not entirely new and will result in highly ambiguous sequencing results, that can only be interpreted by repetition of the sequencing workflow with different dual-base combinations. The approach presented here replaces the dual-base addition of two natural nucleotides with a mixture of a natural and a reversibly terminated nucleotide. Combined with regular deblocking flows to remove the terminators. This will result in less ambiguous sequencing results that can be decoded by only two consecutive sequencing runs with the same template.

The points raised during the first review have now been adequately treated and can in the present form be recommended for publication

Reviewer #2 (Comments to the Authors (Required)):

The authors include all the suggested points, and now the manuscripts seem in a good and acceptable format.



April 1, 2022

RE: Life Science Alliance Manuscript #LSA-2021-01294RR

Prof. Pengfeng Xiao  
Southeast University  
Si Pai Lou 2#, Xuanwu District  
Nanjing 210096  
China

Dear Dr. Xiao,

Thank you for submitting your Methods entitled "Evaluation of the correctable decoding sequencing as a new powerful strategy for DNA sequencing". It is a pleasure to let you know that your manuscript is now accepted for publication in Life Science Alliance. Congratulations on this interesting work.

The final published version of your manuscript will be deposited by us to PubMed Central upon online publication.

Your manuscript will now progress through copyediting and proofing. It is journal policy that authors provide original data upon request.

Reviews, decision letters, and point-by-point responses associated with peer-review at Life Science Alliance will be published online, alongside the manuscript. If you do want to opt out of having the reviewer reports and your point-by-point responses displayed, please let us know immediately.

\*\*\*IMPORTANT: If you will be unreachable at any time, please provide us with the email address of an alternate author. Failure to respond to routine queries may lead to unavoidable delays in publication.\*\*\*

Scheduling details will be available from our production department. You will receive proofs shortly before the publication date. Only essential corrections can be made at the proof stage so if there are any minor final changes you wish to make to the manuscript, please let the journal office know now.

**DISTRIBUTION OF MATERIALS:**

Authors are required to distribute freely any materials used in experiments published in Life Science Alliance. Authors are encouraged to deposit materials used in their studies to the appropriate repositories for distribution to researchers.

You can contact the journal office with any questions, [contact@life-science-alliance.org](mailto:contact@life-science-alliance.org)

Again, congratulations on a very nice paper. I hope you found the review process to be constructive and are pleased with how the manuscript was handled editorially. We look forward to future exciting submissions from your lab.

Sincerely,

Novella Guidi, PhD  
Scientific Editor  
Life Science Alliance
