# Supplementary material for: Evaluation of the correctable decoding sequencing as a new powerful strategy for DNA sequencing
Source: Life Sci Alliance. 2022 Apr 14;5(8):e202101294. doi: 10.26508/lsa.202101294 (PMC9012935; doi:10.26508/lsa.202101294)
Supplement: Supplementary file 1 [file LSA-2021-01294_TableS1.xlsx]

## Sheet: Sheet1
Template	Sequence (5’-3’)
1	AACGCTACTACTATTAGTAGAATTGATGCCACCTTTTCAGCTCGCGCCCC
2	GAAAATATAGCTAAACAGGTTATTGACCATTTGCGAAATGTATCTATGCA
3	ATGGTCAAACTAAATCTACTCGTTCGCAGAATTGGGAATCAACTGTTGCG
4	GGAATGAAACTTCCAGACACCGTACTTTAGTTGCATATTTAAAACATGGT
5	TGAGCTACAGCACCAGATTCAGCAATTAAGCTCTAAGCCATCCGCAAACA
6	TTGGAGTTTGCTTCCGGTCTGGTTCGCTTTGAAGCTCGAATTAAAACGCA
7	TTGCTTCTGACTATAATAGTCAGGGTAAAGACCTGATTTTTGATTTATGG
8	TATTTATGACGATTCCGCAGTATTGGACGCTATCCAGTCTAAACATTTCA
9	GGTTTTTATCGTCGTCTGGTAAACGAGGGTTATGATAGTGTTGCTCTTTA
10	TGCCTCGTAATTCCTTTTGGCGTTATGTATCTGCATTAGTTGAATGTGTG
11	GTATTCCTAAATCTCAACTGATGAATCTTTCTACCTGTAATAATGTTGGA
12	CCGTTAGTTCGTTTTATTAACGTAGATTTTTCTTCCCAACGTCCTGACTG
13	GTATAATGAGCCAGTTCTTAAAATCGCATAAGGTAATTCACAATGATTAC
14	AAAGTTGAAATTAAACCATCTCAAGCCCAATTTACTACTCGTTCTGGTGT
15	CTCGTCAGGGCAAGCCTTATTCACTGAATGAGCAGCTTTGTTACGTTGAT
16	GGGTAATGAATATCCGGTTCTTGTCAAGATTACTCTTGATGAAGGTCACA
17	GCCAGCCTATGCGCCTGGTCTGTACACCGTTCATCTGTCCTCTTTCAAAG
18	TTGGTCAGTTCGGTTCCCTTATGATTGACCGTCTGCGCCTCGTTCCGGCT
19	AAGTAACATGGAGCAGGTCGCGGATTTCGACACAATTTATCAGGCGATGA
20	AAATCTCCGTTGTACTTTGTTTCGCGCTTGGTATAATCGCTGGGGGTCCA
